# Supplementary material for: Total synthesis and anti-cholinesterase activity of marine-derived bis-indole alkaloid fascaplysin
Source: Royal Society of Chemistry journal article supplement (doi:10.1039/c2md20076g), 2012-01-01
Supplement: c2md20076g.pdf [file c2md20076g.pdf]

## Electronic Supplementary Information

### **Total Synthesis and Anti-cholinesterase Activity of Marine-derived Bis-indole Alkaloid Fascaplysin**

**Sandip B. Bharate,<sup>\*</sup> Sudhakar Manda,<sup>†</sup> Prashant Joshi,<sup>†</sup> Baljinder Singh<sup>‡</sup> and Ram A. Vishwakarma<sup>†‡\*</sup>**

<sup>†</sup>*Medicinal Chemistry Division, <sup>‡</sup>Natural Products Chemistry Division, Indian Institute of Integrative Medicine (CSIR), Canal Road, Jammu-180001, India*

*\*E-mail: [sbharate@iiim.ac.in](mailto:sbharate@iiim.ac.in), [ram@iiim.ac.in](mailto:ram@iiim.ac.in)*

*Fax: +91-191-2569333; Tel: +91-191-2569111*

### **Contents**

**Figure S1** (a). Dixon plots representing reciprocal of initial AChE velocity versus fascaplysin concentrations (0.2 to 10  $\mu$ M) at six different concentrations of ATChI as indicated in the graph; (b) secondary replot of the Dixon plot slopes versus reciprocal of the ATChI concentrations.

**Figure S2** (a). Dixon plots representing reciprocal of initial AChE velocity versus fascaplysin concentrations (2 to 100  $\mu$ M) at six different concentrations of BuTChI as indicated in the graph; (b) secondary replot of the Dixon plot slopes versus reciprocal of the substrate concentrations.

**Figure S3** <sup>1</sup>H NMR of fascaplysin (**1**) in CD<sub>3</sub>OD

**Figure S4** <sup>13</sup>C NMR of fascaplysin (**1**) in CD<sub>3</sub>OD

**Figure S5** DEPT-135 spectrum of fascaplysin (**1**) in CD<sub>3</sub>OD

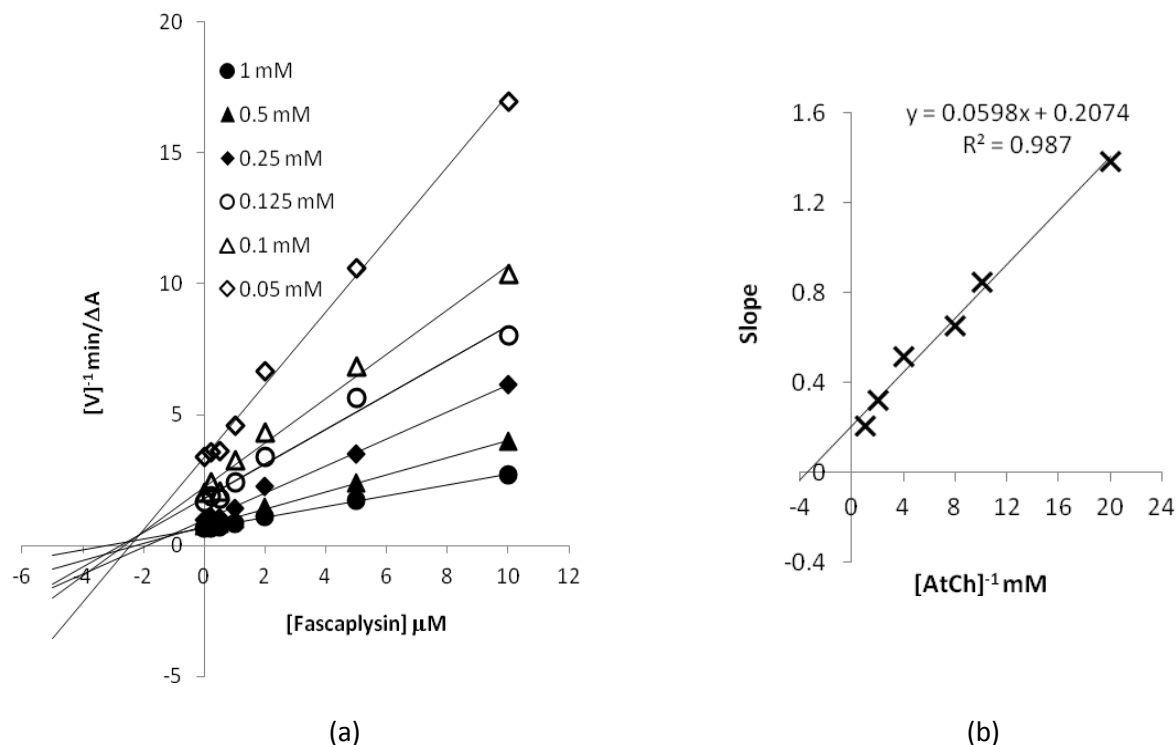

**Figure S1** (a). Dixon plots representing reciprocal of initial AChE velocity versus fascaplysin concentrations (0.2 to 10  $\mu\text{M}$ ) at six different concentrations of ATChI as indicated in the graph; (b) secondary replot of the Dixon plot slopes versus reciprocal of the ATChI concentrations.

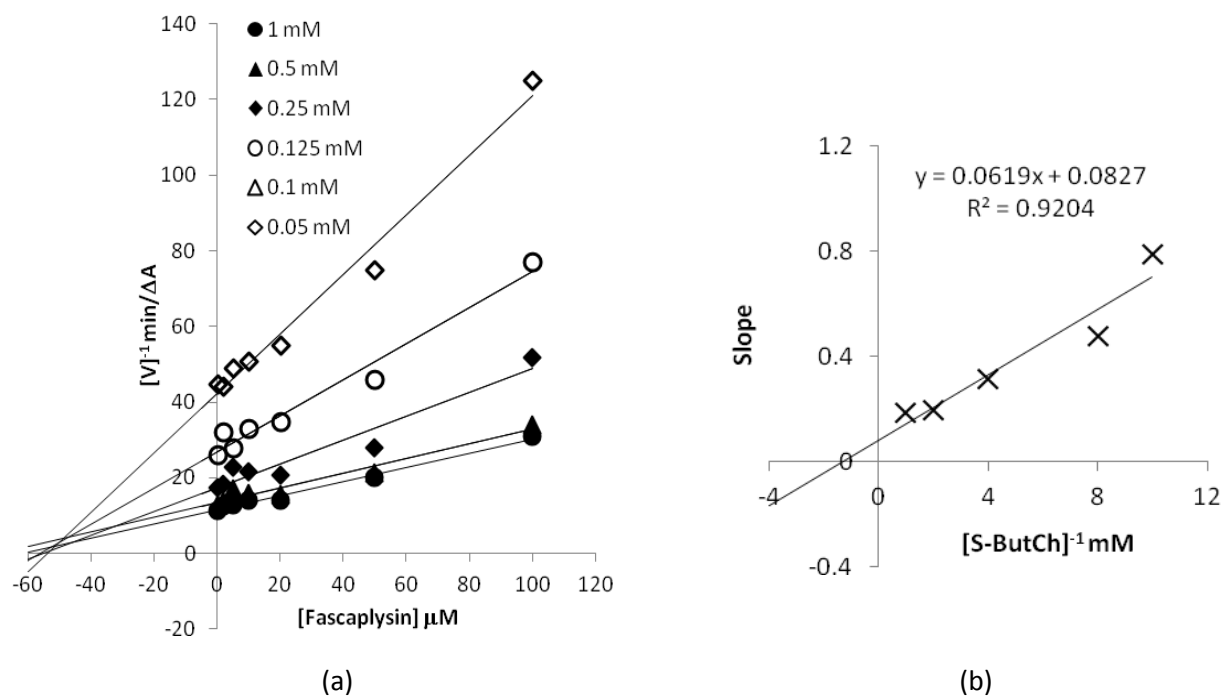

**Figure S2** (a). Dixon plots representing reciprocal of initial AChE velocity versus fascaplysin concentrations (2 to 100  $\mu\text{M}$ ) at six different concentrations of BuTChI as indicated in the graph; (b) secondary replot of the Dixon plot slopes versus reciprocal of the substrate concentrations.

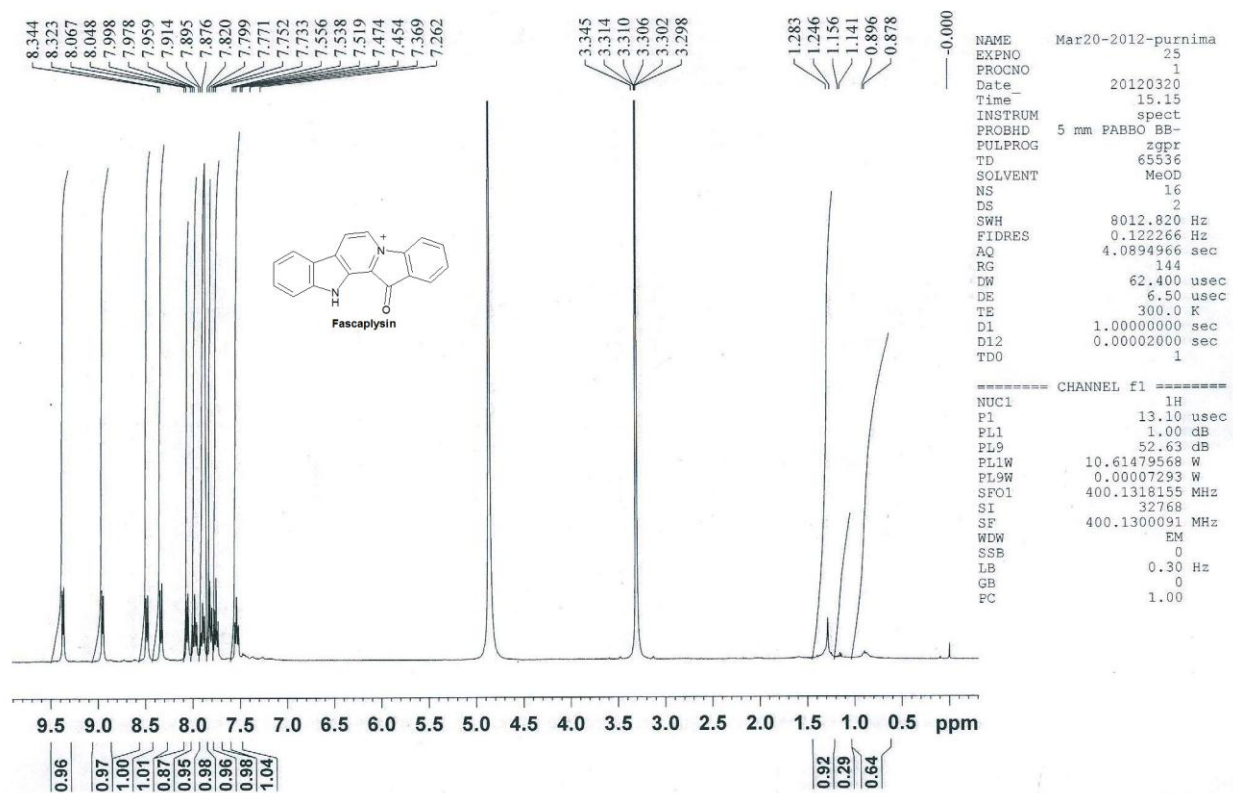

**Figure S3**  $^1\text{H}$  NMR of fascaplysin (**1**) in  $\text{CD}_3\text{OD}$

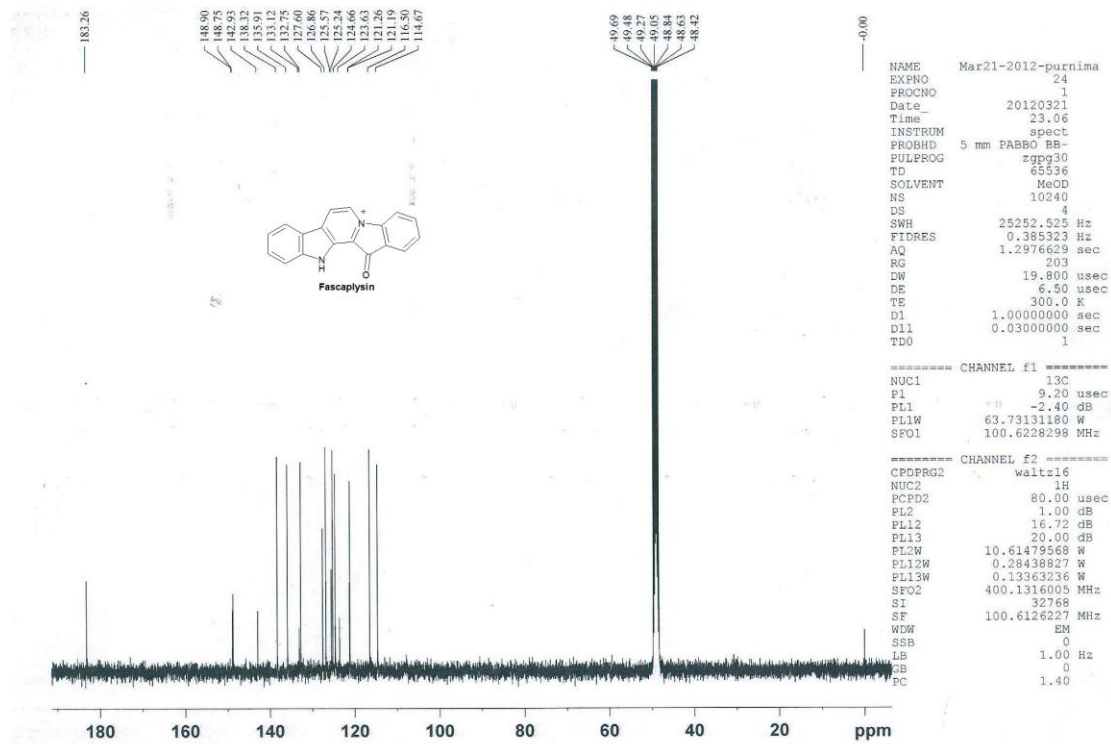

**Figure S4**  $^{13}\text{C}$  NMR of fascaplysin (**1**) in  $\text{CD}_3\text{OD}$

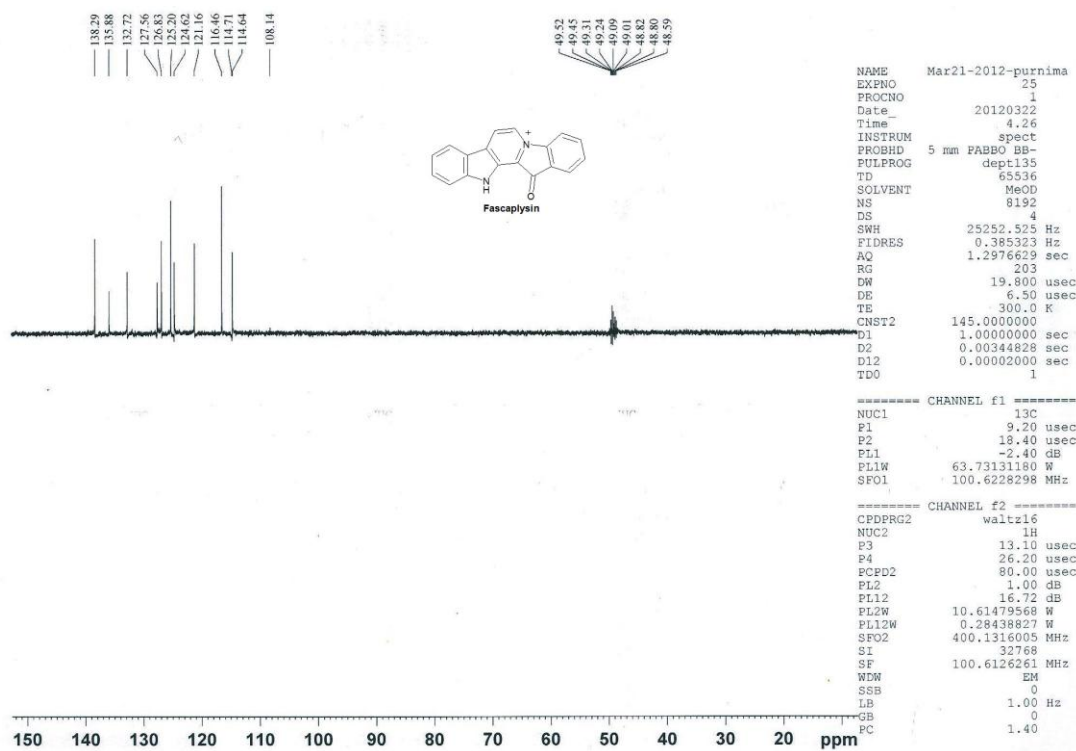

**Figure S5** DEPT-135 spectrum of fascaplysin (1) in CD<sub>3</sub>OD
